# Supplementary material
Source: PubMed Central journal article supplement (PMC6902160)
Supplement: jamainternmed-e195498-s001.pdf [file jamainternmed-e195498-s001.pdf]

## Supplementary Online Content

Paulin LM, Gassett AJ, Alexis NE, et al. Association of long-term ambient ozone exposure with respiratory morbidity in smokers. *JAMA Intern Med*. Published online December 9, 2019. doi:10.1001/jamainternmed.2019.5498

**eFigure 1.** Regression Diagnostics. Distribution of Residual Based on Fully Adjusted Regression Model (A); Scatter Plot of Residual Versus 10-Year Ozone (B)

**eFigure 2.** Fractional Polynomial Approach to Explore the Shape of the Relationship Between Historical Ozone Concentration and FEV<sub>1</sub>% Predicted (A); % Emphysema (B); and 6 MWT (C)

**eFigure 3.** Effect Size of Relationship Between 5 ppb Increase in 10-Year Ozone Concentration and Health Outcomes Without Inclusion of 10-Year PM<sub>2.5</sub> Concentration (A); With Inclusion of PM<sub>2.5</sub> in Model (B)

**eTable 1.** Relationship Between 10-Year Ozone Concentration and Health Outcomes in Current and Former Smokers (n=1874)

**eTable 2.** Relationship Between 10-Year Ozone Concentration and Health Outcomes in Current and Former Smokers (n=1874) With and Without Inclusion of 10-Year PM<sub>2.5</sub> Concentration

**eTable 3.** Relationship Between Historical Ozone Concentration and Health Outcomes in Current and Former Smokers (n=1874) With Varying Exposure Averaging Times

**eTable 4.** Relationship Between Warm Season 10-Year Ozone Concentration (April-September) and Health Outcomes in Current and Former Smokers (n=1874)

This supplementary material has been provided by the authors to give readers additional information about their work.

**Figure 1.** Regression Diagnostics. Distribution of Residual Based on Fully Adjusted Regression Model (A); Scatter Plot of Residual Versus 10-Year Ozone (B)

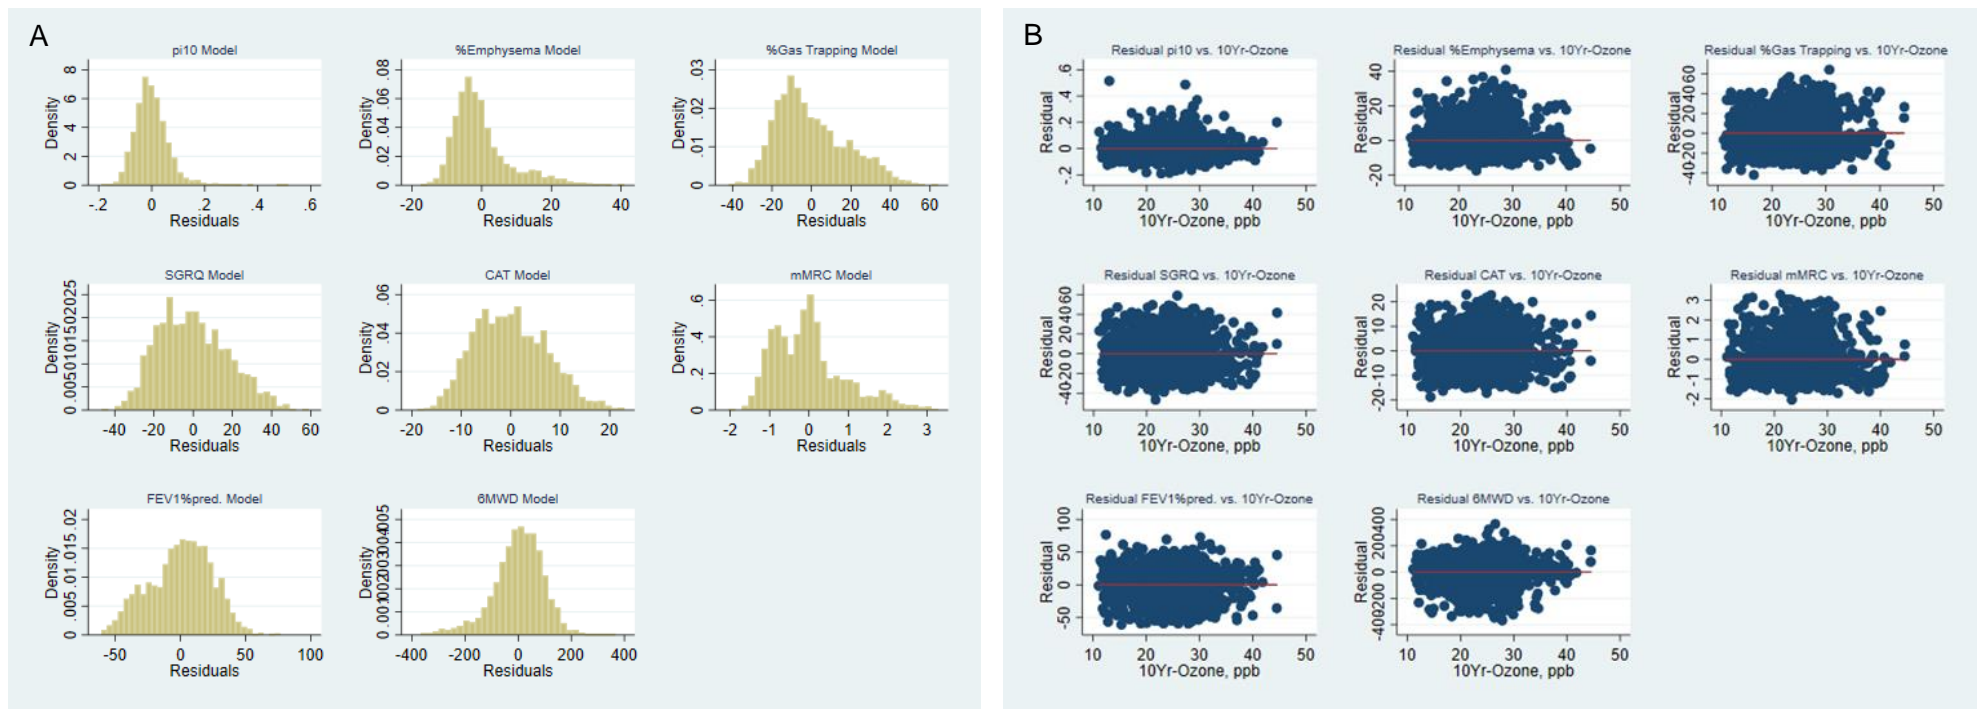

**eFigure 2.** Fractional Polynomial Approach to Explore the Shape of the Relationship Between Historical Ozone Concentration and FEV<sub>1</sub>% Predicted (A); % Emphysema (B); and 6 MWT (C)

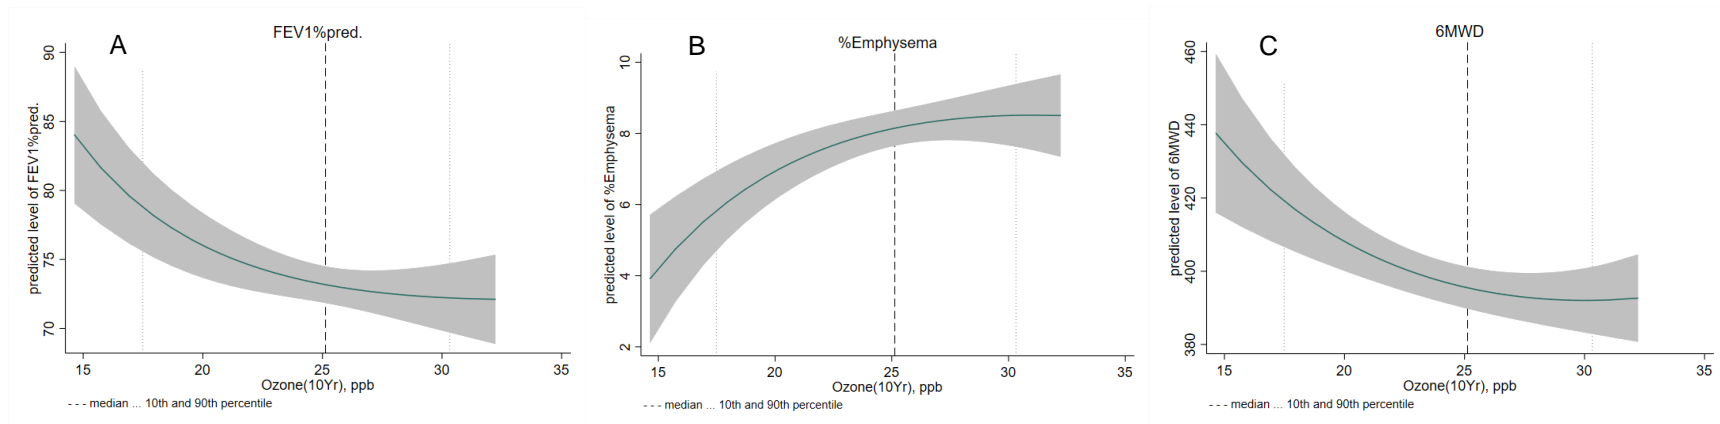

Potential nonlinearity is suggested in the relationship between ozone concentration and FEV<sub>1</sub>% predicted, %Emphysema, and 6MWD by fractional polynomial approach. Point estimates and 95% confidence intervals depict average predicted level of outcome at the observed level of ozone concentration, adjusting for other covariates, constructed using a best-fitting fractional polynomial model to more flexibly identify ozone-outcome functional shape.

**eFigure 3.** Effect Size of Relationship Between 5 ppb Increase in 10-Year Ozone Concentration and Health Outcomes Without Inclusion of 10-Year PM<sub>2.5</sub> Concentration (A); With Inclusion of PM<sub>2.5</sub> in Model (B)

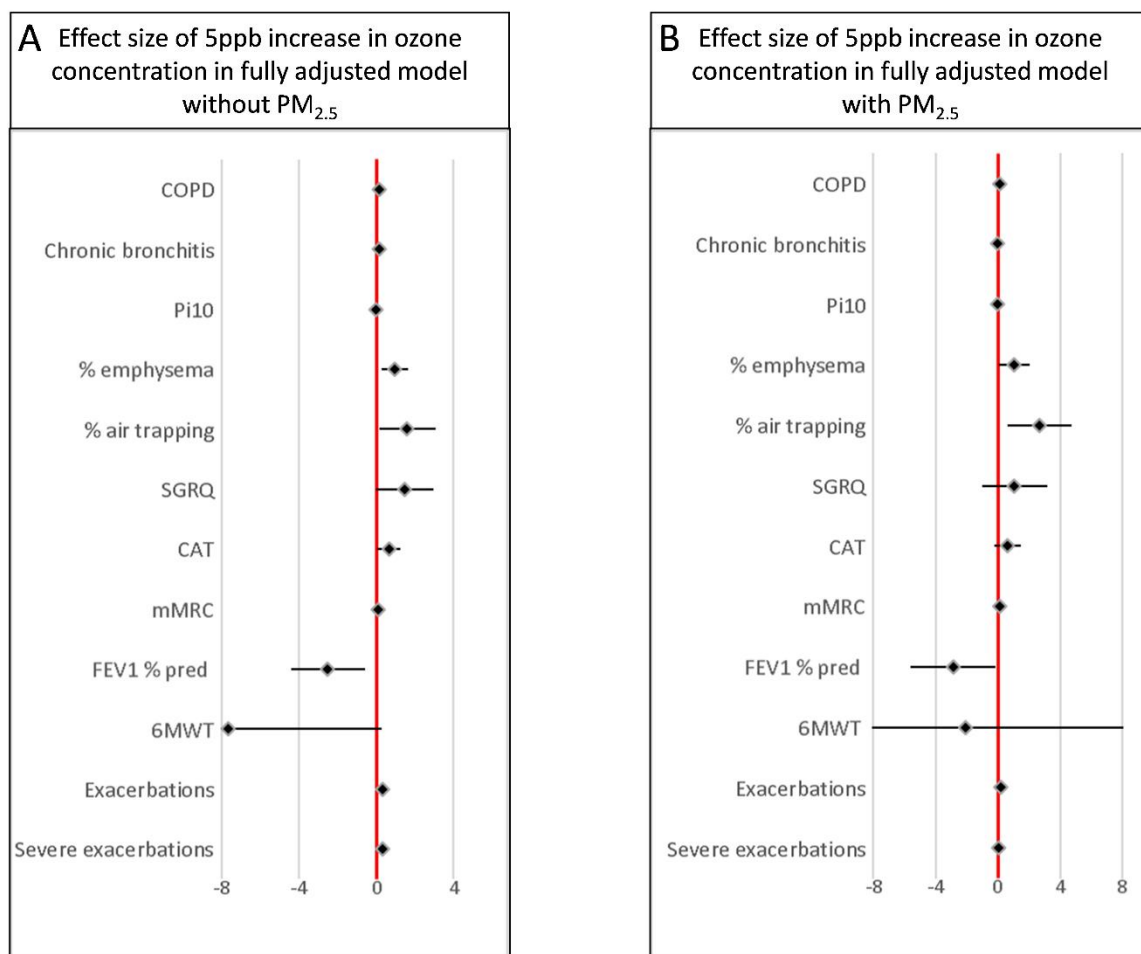

BMI= body mass index, VGDF= vapors, gas, dust or fumes; mMRC=modified Medical Research Council questionnaire; SGRQ=St. George's Respiratory Questionnaire; CAT=COPD assessment test; 6MWT=6-minute walk test-distance; PM<sub>2.5</sub>=Particulate matter with an aerodynamic diameter of 2.5 microns and less

**eTable 1.** Relationship Between 10-Year Ozone Concentration and Health Outcomes in Current and Former Smokers (n=1874)

| Estimated change in outcome per 5ppb increase in 10-year average ozone concentration | Minimally adjusted model (age, race, gender, and study site) |                    |              | Moderately adjusted model (age, race, gender, study site, and personal and neighborhood income) |                      |              | Fully adjusted model (age, race, gender, study site, BMI, current smoking status, pack years, VGDF exposure, education, and personal and neighborhood income) |                     |              |
|--------------------------------------------------------------------------------------|--------------------------------------------------------------|--------------------|--------------|-------------------------------------------------------------------------------------------------|----------------------|--------------|---------------------------------------------------------------------------------------------------------------------------------------------------------------|---------------------|--------------|
|                                                                                      | Effect estimate                                              | 95% CI             | p            | Effect estimate                                                                                 | 95% CI               | p            | Effect estimate                                                                                                                                               | 95% CI              | p            |
| <b>Respiratory disease risk</b>                                                      |                                                              |                    |              |                                                                                                 |                      |              |                                                                                                                                                               |                     |              |
| COPD (OR)                                                                            | 1.06                                                         | 0.90, 1.25         | 0.460        | 1.13                                                                                            | 0.95, 1.34           | 0.174        | 1.16                                                                                                                                                          | 0.97, 1.40          | 0.103        |
| Chronic bronchitis (OR)                                                              | 1.01                                                         | 0.87, 1.18         | 0.858        | 1.11                                                                                            | 0.94, 1.30           | 0.211        | 1.14                                                                                                                                                          | 0.96, 1.35          | 0.139        |
| <b>CT-measured outcomes</b>                                                          |                                                              |                    |              |                                                                                                 |                      |              |                                                                                                                                                               |                     |              |
| Pi10                                                                                 | -0.001                                                       | -0.007, 0.004      | 0.569        | 0.001                                                                                           | -0.004, 0.007        | 0.601        | 0.0001                                                                                                                                                        | -0.005, 0.006       | 0.865        |
| % emphysema                                                                          | <b>0.93</b>                                                  | <b>0.22, 1.63</b>  | <b>0.010</b> | <b>0.91</b>                                                                                     | <b>0.16, 1.66</b>    | <b>0.017</b> | <b>0.94</b>                                                                                                                                                   | <b>0.25, 1.64</b>   | <b>0.007</b> |
| % air trapping                                                                       | <b>1.22</b>                                                  | <b>-0.26, 2.70</b> | <b>0.105</b> | <b>1.60</b>                                                                                     | <b>0.05, 3.16</b>    | <b>0.044</b> | <b>1.60</b>                                                                                                                                                   | <b>0.16, 3.04</b>   | <b>0.030</b> |
| <b>Respiratory morbidity</b>                                                         |                                                              |                    |              |                                                                                                 |                      |              |                                                                                                                                                               |                     |              |
| SGRQ                                                                                 | -0.41                                                        | -1.85, 1.03        | 0.579        | 1.40                                                                                            | -0.08, 2.88          | 0.064        | <b>1.47</b>                                                                                                                                                   | <b>0.01, 2.93</b>   | <b>0.048</b> |
| CAT                                                                                  | -0.10                                                        | -0.69, 0.49        | 0.740        | <b>0.66</b>                                                                                     | <b>0.06, 1.27</b>    | <b>0.032</b> | <b>0.65</b>                                                                                                                                                   | <b>0.05, 1.26</b>   | <b>0.035</b> |
| mMRC                                                                                 | 0.03                                                         | -0.04, 0.10        | 0.448        | <b>0.10</b>                                                                                     | <b>0.02, 0.17</b>    | <b>0.010</b> | <b>0.10</b>                                                                                                                                                   | <b>0.03, 0.17</b>   | <b>0.008</b> |
| FEV <sub>1</sub> % predicted                                                         | -0.99                                                        | -2.84, 0.86        | 0.294        | <b>-2.36</b>                                                                                    | <b>-4.30, -0.41</b>  | <b>0.018</b> | <b>-2.50</b>                                                                                                                                                  | <b>-4.42, -0.59</b> | <b>0.010</b> |
| 6MWT                                                                                 | 3.57                                                         | -4.13, 11.27       | 0.364        | <b>-8.01</b>                                                                                    | <b>-15.95, -0.07</b> | <b>0.048</b> | -7.65                                                                                                                                                         | -15.57, 0.27        | 0.058        |
| <b>Exacerbations</b>                                                                 |                                                              |                    |              |                                                                                                 |                      |              |                                                                                                                                                               |                     |              |
| Any exacerbation in 12 months prior to enrollment (OR)                               | <b>1.27</b>                                                  | <b>1.06, 1.52</b>  | <b>0.009</b> | <b>1.33</b>                                                                                     | <b>1.10, 1.61</b>    | <b>0.003</b> | <b>1.37</b>                                                                                                                                                   | <b>1.12, 1.66</b>   | <b>0.002</b> |
| Severe exacerbation in 12 months prior to enrollment (OR)                            | <b>1.29</b>                                                  | <b>1.03, 1.63</b>  | <b>0.029</b> | <b>1.38</b>                                                                                     | <b>1.08, 1.76</b>    | <b>0.010</b> | <b>1.37</b>                                                                                                                                                   | <b>1.07, 1.76</b>   | <b>0.014</b> |

BMI= body mass index, VGDF= vapors, gas, dust or fumes; mMRC=modified Medical Research Council questionnaire; SGRQ=St. George's Respiratory Questionnaire; CAT=COPD assessment test; 6MWT=6-minute walk test-distance. Boldface entries indicate a statistically significant correlation with a p value less than 0.05.

**eTable 2.** Relationship Between 10-Year Ozone Concentration and Health Outcomes in Current and Former Smokers (n=1874) With and Without Inclusion of 10-Year PM<sub>2.5</sub> Concentration

| Estimated change in outcome per 5ppb increase in 10-year average ozone concentration | Fully adjusted model (age, race, gender, study site, BMI, current smoking status, pack years, VGDF exposure, education, personal income, and neighborhood income) |                     |              | Fully adjusted model (age, race, gender, study site, BMI, current smoking status, pack years, VGDF exposure, education, personal income, neighborhood income, and 10-year average PM <sub>2.5</sub> concentration) |                     |              |
|--------------------------------------------------------------------------------------|-------------------------------------------------------------------------------------------------------------------------------------------------------------------|---------------------|--------------|--------------------------------------------------------------------------------------------------------------------------------------------------------------------------------------------------------------------|---------------------|--------------|
|                                                                                      | Effect estimate                                                                                                                                                   | 95% CI              | p            | Effect estimate                                                                                                                                                                                                    | 95% CI              | p            |
| <b>Respiratory disease risk</b>                                                      |                                                                                                                                                                   |                     |              |                                                                                                                                                                                                                    |                     |              |
| Odds of COPD (OR)                                                                    | 1.16                                                                                                                                                              | 0.97, 1.40          | 0.103        | 1.16                                                                                                                                                                                                               | 0.89, 1.50          | 0.267        |
| Chronic bronchitis (OR)                                                              | 1.14                                                                                                                                                              | 0.96, 1.35          | 0.139        | 1.01                                                                                                                                                                                                               | 0.79, 1.28          | 0.967        |
| <b>CT-measured outcomes</b>                                                          |                                                                                                                                                                   |                     |              |                                                                                                                                                                                                                    |                     |              |
| Pi10                                                                                 | 0.0001                                                                                                                                                            | -0.005, 0.006       | 0.865        | -0.001                                                                                                                                                                                                             | -0.009, 0.007       | 0.801        |
| % emphysema                                                                          | <b>0.94</b>                                                                                                                                                       | <b>0.25, 1.64</b>   | <b>0.007</b> | <b>1.03</b>                                                                                                                                                                                                        | <b>0.05, 2.01</b>   | <b>0.039</b> |
| % air trapping                                                                       | <b>1.60</b>                                                                                                                                                       | <b>0.16, 3.04</b>   | <b>0.030</b> | <b>2.66</b>                                                                                                                                                                                                        | <b>0.62, 4.70</b>   | <b>0.011</b> |
| <b>Respiratory morbidity</b>                                                         |                                                                                                                                                                   |                     |              |                                                                                                                                                                                                                    |                     |              |
| SGRQ                                                                                 | <b>1.47</b>                                                                                                                                                       | <b>0.01, 2.93</b>   | <b>0.048</b> | 1.08                                                                                                                                                                                                               | -0.98, 3.14         | 0.303        |
| CAT                                                                                  | <b>0.65</b>                                                                                                                                                       | <b>0.05, 1.26</b>   | <b>0.035</b> | 0.64                                                                                                                                                                                                               | -0.21, 1.49         | 0.140        |
| mMRC                                                                                 | <b>0.10</b>                                                                                                                                                       | <b>0.03, 0.17</b>   | <b>0.008</b> | <b>0.12</b>                                                                                                                                                                                                        | <b>0.02, 0.23</b>   | <b>0.023</b> |
| FEV <sub>1</sub> % predicted                                                         | <b>-2.50</b>                                                                                                                                                      | <b>-4.42, -0.59</b> | <b>0.010</b> | <b>-2.86</b>                                                                                                                                                                                                       | <b>-5.58, -0.15</b> | <b>0.039</b> |
| 6MWT                                                                                 | -7.65                                                                                                                                                             | -15.57, 0.27        | 0.058        | -2.04                                                                                                                                                                                                              | -13.25, 9.16        | 0.721        |
| <b>Exacerbations</b>                                                                 |                                                                                                                                                                   |                     |              |                                                                                                                                                                                                                    |                     |              |
| Any exacerbation in 12 months prior to enrollment (OR)                               | <b>1.37</b>                                                                                                                                                       | <b>1.12, 1.66</b>   | <b>0.002</b> | 1.26                                                                                                                                                                                                               | 0.95, 1.66          | 0.105        |
| Severe exacerbation in 12 months prior to enrollment (OR)                            | <b>1.37</b>                                                                                                                                                       | <b>1.07, 1.76</b>   | <b>0.014</b> | 1.06                                                                                                                                                                                                               | 0.73, 1.53          | 0.774        |

BMI= body mass index, VGDF= vapors, gas, dust or fumes; mMRC=modified Medical Research Council questionnaire; SGRQ=St. George's Respiratory Questionnaire; CAT=COPD assessment test; 6MWT=6-minute walk test-distance. Boldface entries indicate a statistically significant correlation with a p value less than 0.05.

**eTable 3.** Relationship Between Historical Ozone Concentration and Health Outcomes in Current and Former Smokers (n=1874) With Varying Exposure Averaging Times

|                                                           | Estimated change in outcome per 5ppb increase in <b>1-year</b> average ozone |                     |                  | Estimated change in outcome per 5ppb increase in <b>5-year</b> average ozone |                     |              | Estimated change in outcome per 5ppb increase in <b>10-year</b> average ozone |                     |              |
|-----------------------------------------------------------|------------------------------------------------------------------------------|---------------------|------------------|------------------------------------------------------------------------------|---------------------|--------------|-------------------------------------------------------------------------------|---------------------|--------------|
|                                                           | Effect estimate                                                              | 95% CI              | p                | Effect estimate                                                              | 95% CI              | p            | Effect estimate                                                               | 95% CI              | p            |
| <b>Respiratory disease risk</b>                           |                                                                              |                     |                  |                                                                              |                     |              |                                                                               |                     |              |
| Odds of COPD (OR)                                         | 1.14                                                                         | 0.97, 1.35          | 0.115            | 1.11                                                                         | 0.94, 1.32          | 0.220        | 1.16                                                                          | 0.97, 1.40          | 0.103        |
| Chronic bronchitis (OR)                                   | 1.03                                                                         | 0.88, 1.21          | 0.687            | 1.11                                                                         | 0.95, 1.30          | 0.190        | 1.14                                                                          | 0.96, 1.35          | 0.139        |
| <b>CT-measured outcomes</b>                               |                                                                              |                     |                  |                                                                              |                     |              |                                                                               |                     |              |
| Pi10                                                      | 0.0003                                                                       | -0.005, 0.005       | 0.891            | -0.0001                                                                      | -0.006, 0.004       | 0.820        | 0.001                                                                         | -0.005, 0.006       | 0.865        |
| % emphysema                                               | <b>1.19</b>                                                                  | <b>0.55, 1.84</b>   | <b>&lt;0.001</b> | <b>0.99</b>                                                                  | <b>0.33, 1.65</b>   | <b>0.003</b> | <b>0.94</b>                                                                   | <b>0.25, 1.64</b>   | <b>0.007</b> |
| % air trapping                                            | <b>1.90</b>                                                                  | <b>0.58, 3.23</b>   | <b>0.005</b>     | <b>1.52</b>                                                                  | <b>0.17, 2.87</b>   | <b>0.027</b> | <b>1.60</b>                                                                   | <b>0.16, 3.04</b>   | <b>0.030</b> |
| <b>Respiratory morbidity</b>                              |                                                                              |                     |                  |                                                                              |                     |              |                                                                               |                     |              |
| SGRQ                                                      | <b>1.59</b>                                                                  | <b>0.22, 2.96</b>   | <b>0.023</b>     | <b>1.50</b>                                                                  | <b>0.11, 2.89</b>   | <b>0.034</b> | <b>1.47</b>                                                                   | <b>0.01, 2.93</b>   | <b>0.048</b> |
| CAT                                                       | <b>0.57</b>                                                                  | <b>0.01, 1.13</b>   | <b>0.047</b>     | <b>0.67</b>                                                                  | <b>0.10, 1.24</b>   | <b>0.021</b> | <b>0.65</b>                                                                   | <b>0.05, 1.26</b>   | <b>0.035</b> |
| mMRC                                                      | 0.07                                                                         | -0.001, 0.14        | 0.053            | 0.07                                                                         | -0.002, 0.14        | 0.058        | <b>0.10</b>                                                                   | <b>0.03, 0.17</b>   | <b>0.008</b> |
| FEV <sub>1</sub> % predicted                              | <b>-2.19</b>                                                                 | <b>-3.96, -0.42</b> | <b>0.015</b>     | <b>-1.81</b>                                                                 | <b>-3.61, -0.01</b> | <b>0.049</b> | <b>-2.50</b>                                                                  | <b>-4.42, -0.59</b> | <b>0.010</b> |
| 6MWT                                                      | -2.29                                                                        | -9.69, 5.11         | 0.544            | -4.09                                                                        | -11.59, 3.41        | 0.285        | -7.65                                                                         | -15.57, 0.27        | 0.058        |
| <b>Exacerbations</b>                                      |                                                                              |                     |                  |                                                                              |                     |              |                                                                               |                     |              |
| Any exacerbation in 12 months prior to enrollment (OR)    | <b>1.34</b>                                                                  | <b>1.12, 1.61</b>   | <b>0.001</b>     | <b>1.34</b>                                                                  | <b>1.11, 1.60</b>   | <b>0.002</b> | <b>1.37</b>                                                                   | <b>1.12, 1.66</b>   | <b>0.002</b> |
| Severe exacerbation in 12 months prior to enrollment (OR) | 1.20                                                                         | 0.94, 1.52          | 0.144            | 1.24                                                                         | 0.98, 1.57          | 0.076        | <b>1.37</b>                                                                   | <b>1.07, 1.76</b>   | <b>0.014</b> |

Adjusted for age, race, gender, study site, BMI, current smoking status, pack years, VGDF exposure, education, personal income, and neighborhood income. BMI= body mass index, VGDF= vapors, gas, dust or fumes; mMRC=modified Medical Research Council questionnaire; SGRQ=St. George's Respiratory Questionnaire; CAT=COPD assessment test; 6MWT=6-minute walk test-distance. Boldface entries indicate a statistically significant correlation with a p value less than 0.05.

**eTable 4.** Relationship Between Warm Season 10-Year Ozone Concentration (April-September) and Health Outcomes in Current and Former Smokers (n=1874)

| Estimated change in outcome per <u>5ppb</u> increase in 10-year average ozone concentration | Entire year     |                     |              | Warm season only |                     |              |
|---------------------------------------------------------------------------------------------|-----------------|---------------------|--------------|------------------|---------------------|--------------|
|                                                                                             | Effect estimate | 95% CI              | p            | Effect estimate  | 95% CI              | p            |
| <b>Respiratory disease risk</b>                                                             |                 |                     |              |                  |                     |              |
| Odds of COPD (OR)                                                                           | 1.16            | 0.97, 1.40          | 0.103        | 1.18             | 0.98, 1.41          | 0.085        |
| Chronic bronchitis (OR)                                                                     | 1.14            | 0.96, 1.35          | 0.139        | 1.12             | 0.95, 1.33          | 0.188        |
| <b>CT-measured outcomes</b>                                                                 |                 |                     |              |                  |                     |              |
| Pi10                                                                                        | 0.001           | -0.005, 0.006       | 0.865        | 0.001            | -0.004, 0.007       | 0.684        |
| % emphysema                                                                                 | <b>0.94</b>     | <b>0.25, 1.64</b>   | <b>0.007</b> | <b>0.95</b>      | <b>0.25, 1.64</b>   | <b>0.008</b> |
| % air trapping                                                                              | <b>1.60</b>     | <b>0.16, 3.04</b>   | <b>0.030</b> | <b>1.75</b>      | <b>0.30, 3.20</b>   | <b>0.018</b> |
| <b>Respiratory morbidity</b>                                                                |                 |                     |              |                  |                     |              |
| SGRQ                                                                                        | <b>1.47</b>     | <b>0.01, 2.93</b>   | <b>0.048</b> | <b>1.54</b>      | <b>0.07, 3.01</b>   | <b>0.041</b> |
| CAT                                                                                         | <b>0.65</b>     | <b>0.05, 1.26</b>   | <b>0.035</b> | <b>0.78</b>      | <b>0.17, 1.38</b>   | <b>0.012</b> |
| mMRC                                                                                        | <b>0.10</b>     | <b>0.03, 0.17</b>   | <b>0.008</b> | <b>0.12</b>      | <b>0.04, 0.19</b>   | <b>0.002</b> |
| FEV <sub>1</sub> % predicted                                                                | <b>-2.50</b>    | <b>-4.42, -0.59</b> | <b>0.010</b> | <b>-2.68</b>     | <b>-4.61, -0.76</b> | <b>0.006</b> |
| 6MWT                                                                                        | -7.65           | -15.57, 0.27        | 0.058        | -6.76            | -14.78, 1.26        | 0.099        |
| <b>Exacerbations</b>                                                                        |                 |                     |              |                  |                     |              |
| Any exacerbation in 12 months prior to enrollment (OR)                                      | <b>1.37</b>     | <b>1.12, 1.66</b>   | <b>0.002</b> | <b>1.37</b>      | <b>1.13, 1.67</b>   | <b>0.002</b> |
| Severe exacerbation in 12 months prior to enrollment (OR)                                   | <b>1.37</b>     | <b>1.07, 1.76</b>   | <b>0.014</b> | <b>1.35</b>      | <b>1.05, 1.74</b>   | <b>0.020</b> |

Adjusted for age, race, gender, study site, BMI, current smoking status, pack years, VGDF exposure, education, personal income, and neighborhood income. BMI= body mass index, VGDF= vapors, gas, dust or fumes; mMRC=modified Medical Research Council questionnaire; SGRQ=St. George's Respiratory Questionnaire; CAT=COPD assessment test; 6MWT=6-minute walk test-distance. Boldface entries indicate a statistically significant correlation with a p value less than 0.05.
